# Supplementary material for: Unusual localization and presentation of osteoid osteoma mimicking juvenile spondyloarthritis: a case report
Source: Springer Nature journal article supplement (doi:10.1186/s12891-018-2383-1), 2019-01-08
Supplement: MOESM1 [file 16385214]

| <b>Dates</b>      | <b>Summaries from Initial and Follow-up Visits</b>                                 | <b>Diagnostic Testing (including dates)</b>                                                                           | <b>Interventions</b>                                                                       |
|-------------------|------------------------------------------------------------------------------------|-----------------------------------------------------------------------------------------------------------------------|--------------------------------------------------------------------------------------------|
| <b>06/02/2012</b> | Initial visit to GP                                                                | Hand radiograms                                                                                                       |                                                                                            |
| <b>25/04/2012</b> | Visit to physical medicine and rehabilitation specialist (rheumatology department) | Initial visit                                                                                                         | Physical therapy, consultation of paediatric orthopaedic surgeon requested                 |
| <b>09/05/2012</b> | Visit to paediatric orthopaedic surgeon                                            | Initial visit, Blood testing (SR, CBC, CRP, AP, RF and ANF , MRI of the 5 <sup>th</sup> finger)                       |                                                                                            |
| <b>20/06/2012</b> | MRI interpretation                                                                 | tenosynovitis                                                                                                         |                                                                                            |
| <b>18/07/2012</b> | Visit to paediatric orthopaedic surgeon                                            | Follow-up, DD: dactylitis                                                                                             | Ibuprofen 200 mg 3x1 for 2 weeks                                                           |
| <b>01/08/2012</b> | Visit to paediatric orthopaedic surgeon                                            | Follow-up                                                                                                             | Ibuprofen 200 mg 2x1                                                                       |
| <b>19/09/2012</b> | Visit to paediatric orthopaedic surgeon                                            | Follow-up                                                                                                             | Ibuprofen 200 mg 3x1, Controloc 20 mg, observation                                         |
| <b>29/10/2012</b> | Visit to allergy and immunology department.<br>Visit to dermatology                | Initial visit, Diagnosis: tenosynovitis                                                                               | Serology testing for Borrelia burgdorferi, consultation of paediatrics orthopaedic surgeon |
| <b>08/11/2012</b> | Visit to plastic, reconstructive and aesthetic surgeon                             | Initial visit                                                                                                         | MRI follow-u suggested                                                                     |
| <b>21/11/2012</b> | B. burgdorferi IgM and IgG testing                                                 | Negative results (CLIA method)                                                                                        |                                                                                            |
| <b>13/05/2013</b> | Visit to paediatrics endocrinology and diabetes specialist                         | Initial visit, Differential diagnosis: Proteus syndrome                                                               | consultation of paediatrics orthopaedic surgeon                                            |
| <b>24/05/2013</b> | Visit to paediatric haematology and oncology specialist                            | Initial visit                                                                                                         | Skeletal scintigraphy suggested, consultation of paediatrics immunorheumatologist          |
| <b>06/07/2013</b> | Visit to paediatrics immunorheumatologist                                          | Initial visit, musculoskeletal ultrasound examination<br>Differential diagnosis: Tenosynovitis or spondyloarthropathy | Indomethacin 25 mg 2x1 per os., Intra-articular triamcinolone hexacetonid injections       |
| <b>20/08/2013</b> | Visit to paediatric immunorheumatologist                                           | Follow-up visit; musculoskeletal ultrasound                                                                           |                                                                                            |
| <b>06/12/2013</b> | Radiology department                                                               | Hand radiograms, Differential diagnosis: benign neoplasm of bone and articular cartilage                              | Consultation of paediatrics orthopaedic surgeon                                            |

|                   |                                                                      |                                                                        |                                                                                      |
|-------------------|----------------------------------------------------------------------|------------------------------------------------------------------------|--------------------------------------------------------------------------------------|
| <b>14/01/2014</b> | Visit to paediatric orthopaedic surgeon                              | Initial visit, Blood work (SR, CBC, CRP), MRI, Skeletal scintigraphy   |                                                                                      |
| <b>22/01/2014</b> | Oncology and nuclear medicine department                             | Skeletal scintigraphy, Differential diagnosis: spondyloarthropathy, RA |                                                                                      |
| <b>15/04/2014</b> | MRI and interpretation                                               | Differential diagnosis: Osteomyelitis, enchondroma, osteoid osteoma    |                                                                                      |
| <b>13/05/2014</b> | Visit to paediatric orthopaedic surgeon                              | Follow-up                                                              |                                                                                      |
| <b>18/06/2014</b> | Visit to paediatric orthopaedic surgeon                              | Follow-up                                                              |                                                                                      |
| <b>01/07/2014</b> | Visit to paediatric orthopaedic surgeon                              | Follow-up                                                              |                                                                                      |
| <b>10/07/2014</b> | Visit to anaesthesiology reanimatology and intensive care specialist | Preoperative evaluation (CBC, SR, APTV, PV, TV, fibrinogen, urine)     | Consultation of paediatric cardiologist                                              |
| <b>10/07/2014</b> | Visit to paediatric orthopaedic surgeon                              | Follow-up<br>Hand radiograms                                           |                                                                                      |
| <b>11/07/2014</b> | Visit of paediatric cardiologist                                     | ECG, echocardiography                                                  |                                                                                      |
| <b>14/07/2014</b> | Admission to Orthopaedic Division                                    |                                                                        |                                                                                      |
| <b>15/07/2014</b> | Surgery (complete excisional biopsy)                                 |                                                                        | Pathology analysis, clindamycin 3x500 mg i.v. then continuation with 4x300 mg per os |
| <b>17/7/2014</b>  | Discharge from Hospital                                              |                                                                        | Clindamycin 4x300 mg per os                                                          |
| <b>20/07/2014</b> | Visit to paediatric orthopaedic surgeon                              | Follow-up;<br>Wound dressing                                           | Clindamycin 4x300 mg per os                                                          |
| <b>25/07/2014</b> | Pathology department                                                 | Pathology report: osteoid osteoma                                      |                                                                                      |
| <b>26/07/2014</b> | Visit to paediatric orthopaedic surgeon                              | Follow-up;<br>Wound dressing                                           | Clindamycin 4x300 mg per os excluded                                                 |
| <b>26/08/2014</b> | Visit to paediatric orthopaedic surgeon                              | Follow-up                                                              |                                                                                      |
| <b>26/04/2015</b> | Visit to paediatric orthopaedic surgeon                              | Follow-up                                                              |                                                                                      |
| <b>26/06/2018</b> | Visit to paediatric orthopaedic surgeon                              | Follow-up                                                              |                                                                                      |
